# Supplementary material for: Protective Effect of Spore Powder of Antrodia camphorata ATCC 200183 on CCl4-Induced Liver Fibrosis in Mice
Source: MDPI journal article supplement (doi:10.3390/nu12092778), 2020-09-11
Supplement: s1 [file s1]

**Supplementary Table 1.** Proximate composition of spore, mycelia and cultural broth of *A. camphorata*

| Component (g/100g)   | Spore | Mycelia | Cultural broth  |
|----------------------|-------|---------|-----------------|
| Ash                  | 1.03  | 1.79    | 0.59            |
| Fiber                | 7.74  | 8.26    | nd <sup>1</sup> |
| Fat                  | 2.79  | 2.07    | 0.13            |
| Protein              | 36.88 | 33.32   | 33.31           |
| Carbohydrate         | 51.89 | 54.56   | 65.81           |
| Crude polysaccharide | 13.10 | 16.23   | nd <sup>1</sup> |

<sup>1</sup> Not detected.

**Supplementary Table 2.** Mineral contents of spore, mycelia and cultural broth of *A. camphorata*

| Content (mg/100g) | Spore                | Mycelia              | Cultural broth       |
|-------------------|----------------------|----------------------|----------------------|
| K                 | 3460                 | 747                  | 863.56               |
| Na                | 447                  | 55.8                 | 59.39                |
| Ca                | 112                  | 61.4                 | 93.50                |
| Mg                | 1210                 | 148                  | 284.11               |
| Cu                | 0.34                 | 0.23                 | nd <sup>1</sup>      |
| Mn                | 0.74                 | 0.77                 | 0.47                 |
| Fe                | 11.3                 | 13                   | 17.66                |
| Zn                | 3.37                 | 3.98                 | 0.30                 |
| Pb                | 0.021                | 0.022                | nd <sup>1</sup>      |
| As                | 5.4×10 <sup>-3</sup> | 2.4×10 <sup>-3</sup> | 4.8×10 <sup>-3</sup> |

<sup>1</sup> Not detected.

**Supplementary Table 3.** Fatty acid composition of spore, mycelia and cultural broth of *A. camphorata*

| Content                                                            | Relative content of fatty acid (%) |         |                |
|--------------------------------------------------------------------|------------------------------------|---------|----------------|
|                                                                    | Spore                              | Mycelia | Cultural broth |
| Palmitic acid (C <sub>16</sub> H <sub>32</sub> O <sub>2</sub> )    | 21.52                              | 22.28   | 41.04          |
| Palmitoleic acid (C <sub>16</sub> H <sub>30</sub> O <sub>2</sub> ) | 1.49                               | 1.17    | 0.98           |
| Stearic acid (C <sub>18</sub> H <sub>36</sub> O <sub>2</sub> )     | 37.10                              | 33.04   | 20.78          |
| Oleic acid (C <sub>18</sub> H <sub>34</sub> O <sub>2</sub> )       | 21.92                              | 20.35   | 22.67          |
| Linoleic acid (C <sub>18</sub> H <sub>32</sub> O <sub>2</sub> )    | 14.32                              | 18.09   | 14.50          |
| Linolenic acid (C <sub>18</sub> H <sub>30</sub> O <sub>2</sub> )   | 2.79                               | 3.54    | 1.03           |

**Supplementary Table 4.** Amino acid composition of spore, mycelia and cultural broth of *A. camphorata*

| Content (g/100g)       | Spore       | Mycelia     | Cultural broth              |
|------------------------|-------------|-------------|-----------------------------|
| Asp                    | 2.09        | 2.3         | 5.23×10 <sup>-2</sup>       |
| Glu                    | 4.41        | 3.12        | 1.01×10 <sup>-1</sup>       |
| Ser                    | 1.75        | 1.41        | 2.75×10 <sup>-2</sup>       |
| His                    | 0.69        | 0.63        | 8.23×10 <sup>-3</sup>       |
| Gly                    | 1.76        | 1.4         | 1.59×10 <sup>-1</sup>       |
| Thr <sup>1</sup>       | 1.51        | 1.27        | 1.60×10 <sup>-2</sup>       |
| Arg                    | 2.32        | 2.15        | 5.30×10 <sup>-2</sup>       |
| Ala                    | 3.24        | 3.04        | 6.83×10 <sup>-2</sup>       |
| Tyr                    | 0.88        | 0.77        | 8.00×10 <sup>-3</sup>       |
| Cys                    | 0.17        | 0.24        | 9.87×10 <sup>-4</sup>       |
| Val <sup>1</sup>       | 1.58        | 1.39        | 2.28×10 <sup>-2</sup>       |
| <b>Met<sup>1</sup></b> | <b>0.51</b> | <b>0.46</b> | <b>5.87×10<sup>-3</sup></b> |
| Phe <sup>1</sup>       | 1.57        | 1.44        | 1.78×10 <sup>-2</sup>       |
| Ile <sup>1</sup>       | 1.14        | 0.98        | 1.34×10 <sup>-2</sup>       |
| Leu <sup>1</sup>       | 2.42        | 2.13        | 3.07×10 <sup>-2</sup>       |
| Lys <sup>1</sup>       | 1.82        | 1.59        | 2.89×10 <sup>-2</sup>       |
| Pro <sup>1</sup>       | 2.32        | 1.91        | 1.00×10 <sup>-1</sup>       |
| Trp <sup>1</sup>       | 0.38        | 0.26        | Nd <sup>2</sup>             |
| Total amino acids      | 30.56       | 26.49       | 7.14×10 <sup>-1</sup>       |
| Essential amino acids  | 10.93       | 9.52        | 1.35×10 <sup>-1</sup>       |

<sup>1</sup> Essential amino acid. <sup>2</sup> Not detected.

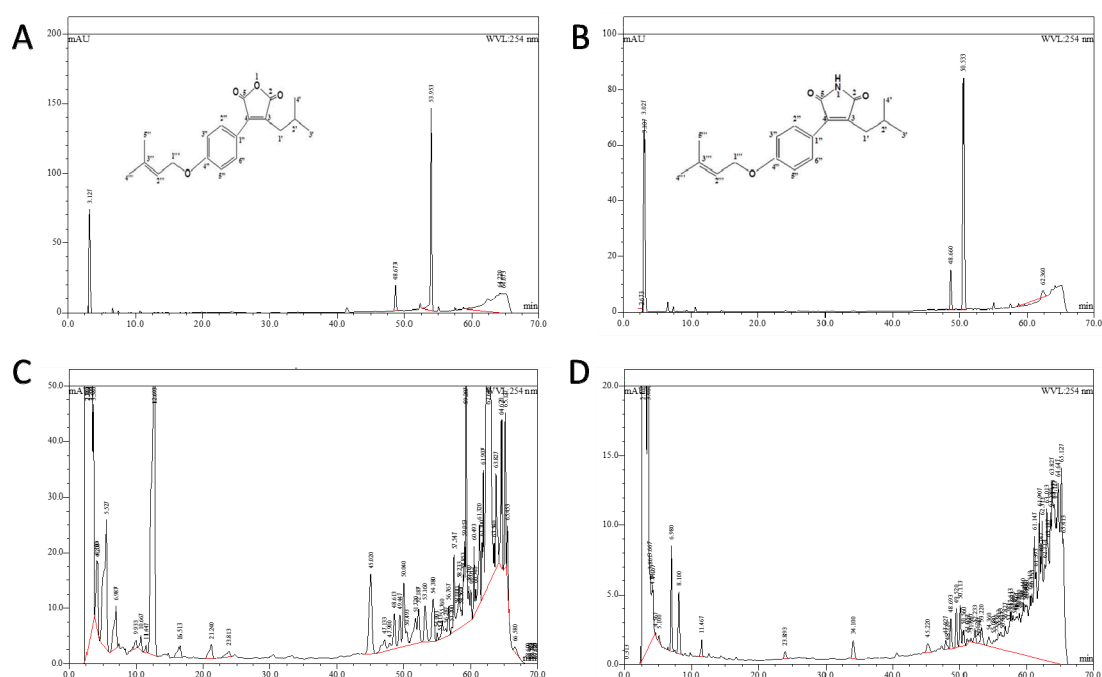

**Supplementary Figure 1.** Chromatograms of antrodin standards and methanol extract of *A. camphorata* spore. (A) standard of antrodin A; (B) standard of antrodin B; (C) methanol extract of *A. camphorata* spore; (D) methanol extract of *A. camphorata* mycelia.

**Supplementary Table 5.** Antrodin A and antrodin B content of spore and mycelia of *A. camphorata*

| Content (mg/kg) | Spore  | Mycelia |
|-----------------|--------|---------|
| antrodin A      | 0.7865 | 0.3158  |
| antrodin B      | 1.8722 | 1.2221  |

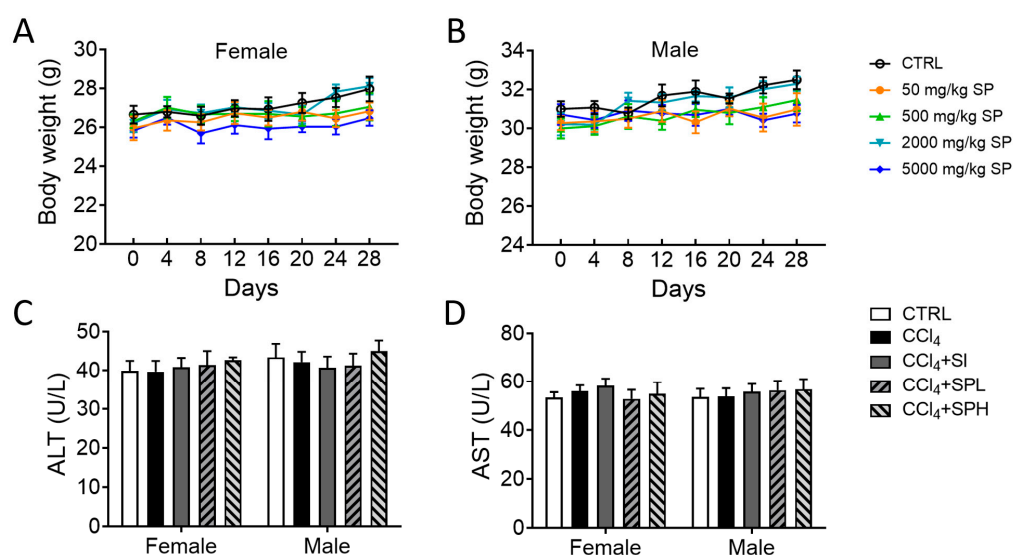

**Supplementary Figure 2.** Body weight change in mice during spore powder of *A. camphorata* by oral gavage daily for 28 days. Data are expressed as means  $\pm$  SD (n = 5).

**Supplementary Table 6.** The organ coefficient results of mice treated orally with spore powder of *A.*

*camphorata* daily for 28 days. Data are expressed as means  $\pm$  SEM (n = 5).

| Parameters        | Control         | 50 mg/kg SP     | 500 mg/kg SP    | 2000 mg/kg SP   | 5000 mg/kg SP   |
|-------------------|-----------------|-----------------|-----------------|-----------------|-----------------|
| <i>Female</i>     |                 |                 |                 |                 |                 |
| Heart (g/100 g)   | 0.53 $\pm$ 0.06 | 0.57 $\pm$ 0.05 | 0.49 $\pm$ 0.04 | 0.55 $\pm$ 0.04 | 0.52 $\pm$ 0.04 |
| Liver (g/100 g)   | 5.42 $\pm$ 0.17 | 4.29 $\pm$ 0.07 | 5.39 $\pm$ 0.48 | 5.51 $\pm$ 0.24 | 5.40 $\pm$ 0.16 |
| Spleen (g/100 g)  | 0.32 $\pm$ 0.03 | 0.20 $\pm$ 0.05 | 0.39 $\pm$ 0.04 | 0.32 $\pm$ 0.01 | 0.31 $\pm$ 0.04 |
| Lung (g/100 g)    | 0.52 $\pm$ 0.07 | 0.63 $\pm$ 0.03 | 0.59 $\pm$ 0.03 | 0.51 $\pm$ 0.05 | 0.60 $\pm$ 0.03 |
| Kidney (g/100 g)  | 1.25 $\pm$ 0.05 | 1.19 $\pm$ 0.05 | 1.14 $\pm$ 0.08 | 1.21 $\pm$ 0.05 | 1.12 $\pm$ 0.06 |
| Brain (g/100 g)   | 1.32 $\pm$ 0.11 | 1.17 $\pm$ 0.21 | 0.97 $\pm$ 0.09 | 1.56 $\pm$ 0.06 | 1.16 $\pm$ 0.08 |
| Stomach (g/100 g) | 0.89 $\pm$ 0.08 | 0.95 $\pm$ 0.06 | 0.87 $\pm$ 0.02 | 0.96 $\pm$ 0.10 | 0.86 $\pm$ 0.09 |
| Thymus (g/100 g)  | 0.39 $\pm$ 0.02 | 0.37 $\pm$ 0.06 | 0.31 $\pm$ 0.02 | 0.27 $\pm$ 0.05 | 0.31 $\pm$ 0.01 |
| <i>Male</i>       |                 |                 |                 |                 |                 |
| Heart (g/100 g)   | 0.63 $\pm$ 0.06 | 0.64 $\pm$ 0.06 | 0.63 $\pm$ 0.01 | 0.60 $\pm$ 0.03 | 0.46 $\pm$ 0.04 |
| Liver (g/100 g)   | 5.32 $\pm$ 0.23 | 5.03 $\pm$ 0.21 | 5.30 $\pm$ 0.21 | 0.52 $\pm$ 0.19 | 4.48 $\pm$ 0.23 |
| Spleen (g/100 g)  | 0.28 $\pm$ 0.03 | 0.28 $\pm$ 0.03 | 0.33 $\pm$ 0.01 | 0.31 $\pm$ 0.01 | 0.26 $\pm$ 0.02 |
| Lung (g/100 g)    | 0.59 $\pm$ 0.08 | 0.62 $\pm$ 0.04 | 0.68 $\pm$ 0.05 | 0.61 $\pm$ 0.03 | 0.53 $\pm$ 0.01 |
| Kidney (g/100 g)  | 1.37 $\pm$ 0.19 | 1.34 $\pm$ 0.18 | 1.70 $\pm$ 0.03 | 2.02 $\pm$ 0.09 | 1.51 $\pm$ 0.08 |
| Brain (g/100 g)   | 0.97 $\pm$ 0.13 | 1.19 $\pm$ 0.06 | 1.10 $\pm$ 0.03 | 1.08 $\pm$ 0.04 | 1.08 $\pm$ 0.06 |
| Stomach (g/100 g) | 0.98 $\pm$ 0.28 | 0.82 $\pm$ 0.12 | 0.96 $\pm$ 0.09 | 1.00 $\pm$ 0.02 | 0.78 $\pm$ 0.07 |
| Thymus (g/100 g)  | 0.28 $\pm$ 0.03 | 0.23 $\pm$ 0.07 | 0.23 $\pm$ 0.03 | 0.24 $\pm$ 0.01 | 0.28 $\pm$ 0.03 |
